# Supplementary material
Source: MDPI journal article supplement (https://www.mdpi.com/2075-4701/14/1/16)
Supplement: s1 [file s1]

Table S1. Neutron absorbing cross-sections of Fe and Gd.

| Element | Atomic weight<br>(g/mol) | Density (g/ cm <sup>3</sup> ) | 0.025 eV Total Neutron<br>Cross Section (barns) |
|---------|--------------------------|-------------------------------|-------------------------------------------------|
| Fe      | 55.845                   | 7.87                          | 14.07                                           |
| Gd      | 157.25                   | 7.95                          | 49,153                                          |
